# Supplementary material
Source: ML conference proceedings conference paper supplement (https://proceedings.neurips.cc/paper_files/paper/2017/hash/831caa1b600f852b7844499430ecac17-Abstract.html)
Supplement: Supplementary file [file 831caa1b600f852b7844499430ecac17-Supplemental.zip]

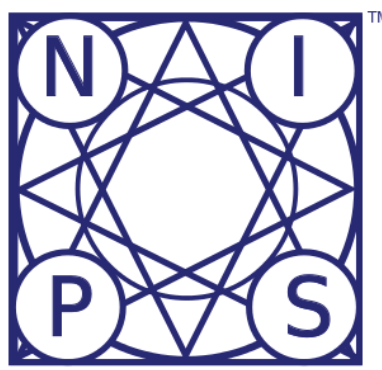

# Working Hard to Know Your Neighbors' Margins: Local Descriptor Learning Loss

Anastasiya Mishchuk<sup>1</sup>, Dmytro Mishkin<sup>2</sup>, Filip Radenovic<sup>2</sup>, Jiri Matas<sup>2</sup>

1. Szkoeka Research Group, Ukraine. anastasiya.mishchuk@gmail.com

2. Visual Recognition Group, Center for Machine Perception, FEE, CTU in Prague. {mishkdmy, filip.radenovic, matas}@cmp.felk.cvut.cz

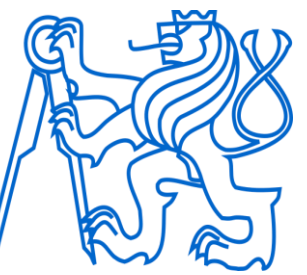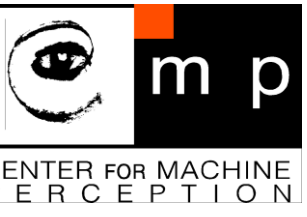

## Summary

We introduce:

1. **HardNet local feature descriptor** which improves state-of-the-art in wide baseline stereo, patch matching, verification and retrieval and in image retrieval.
2. **HardNet triplet loss for metric learning tasks** which maximizes the distance between the closest positive and closest negative example in the batch. HardNet loss is better than complex regularization methods; it is inspired by SIFT matching scheme.

## HardNet Triplet Loss

Patches are described by HardNet, then  $n \times n$  distance matrix  $D$  is calculated,  $n$  – mini-batch size. For each **positive** pair  $(a, p)$  find the **non-matching descriptor closest** to either  $a$  or  $p$ .

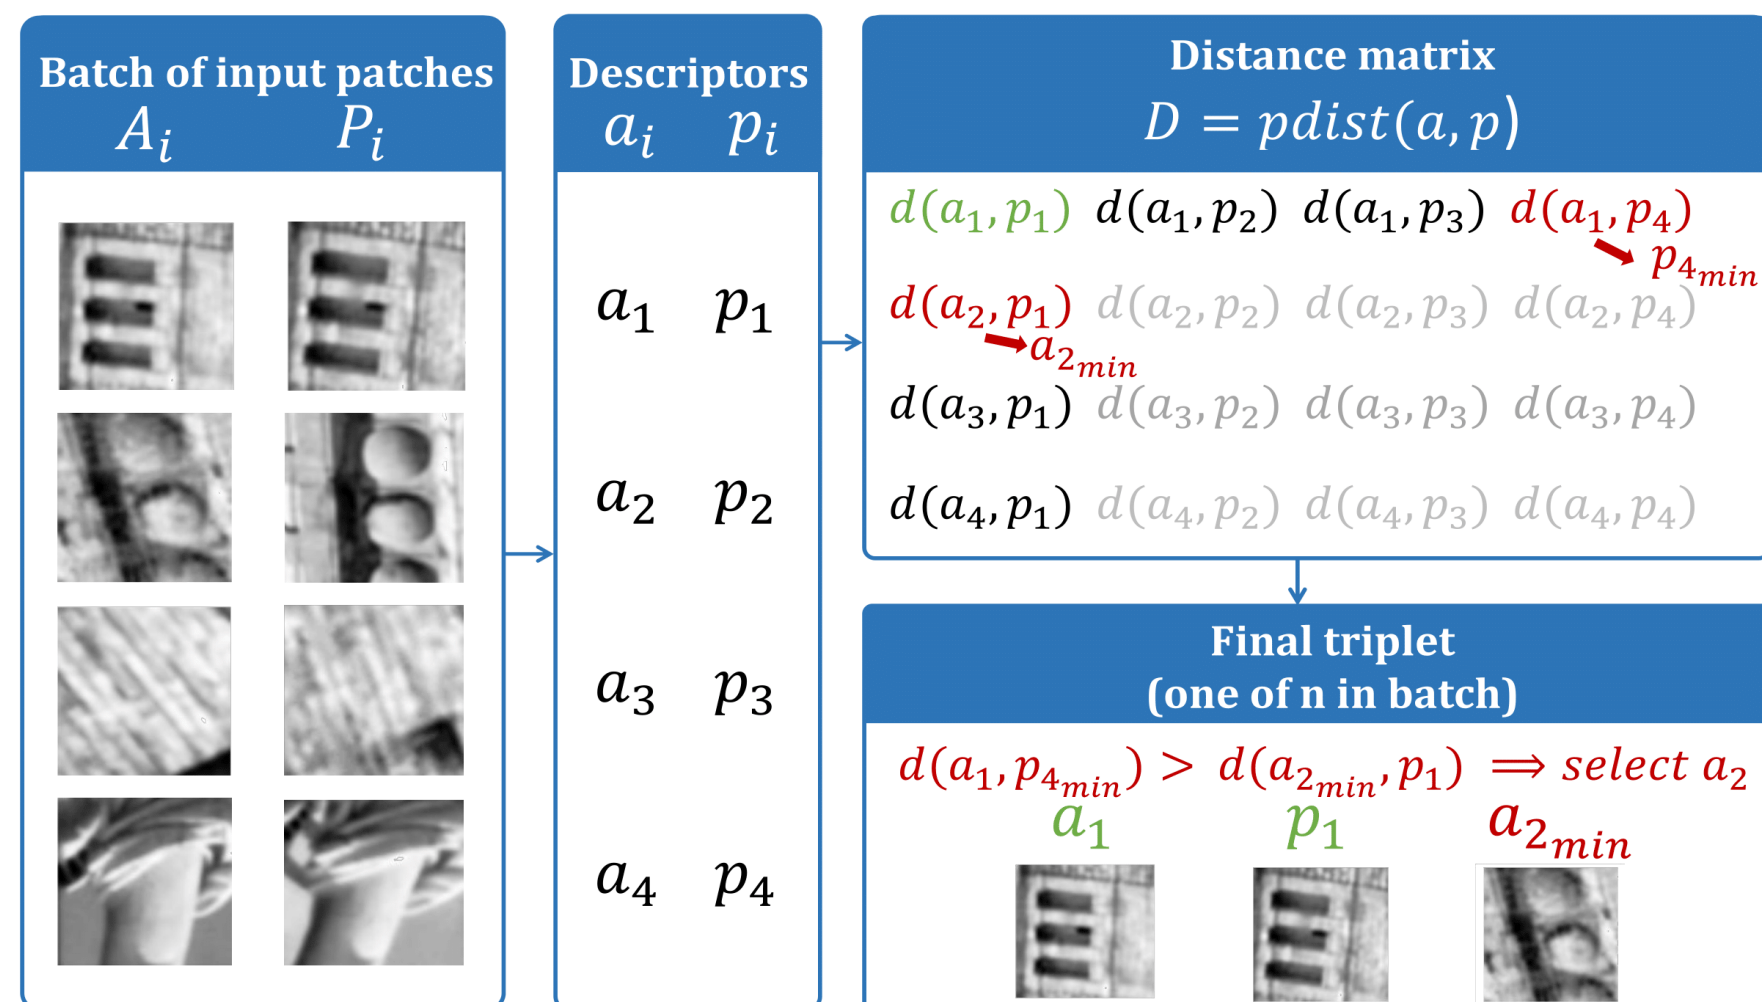

Contribution to the gradient magnitude from the positive and negative examples. Horizontal and vertical axes show the distance from the anchor ( $a$ ) to the negative ( $n$ ) and positive ( $p$ ) examples respectively.

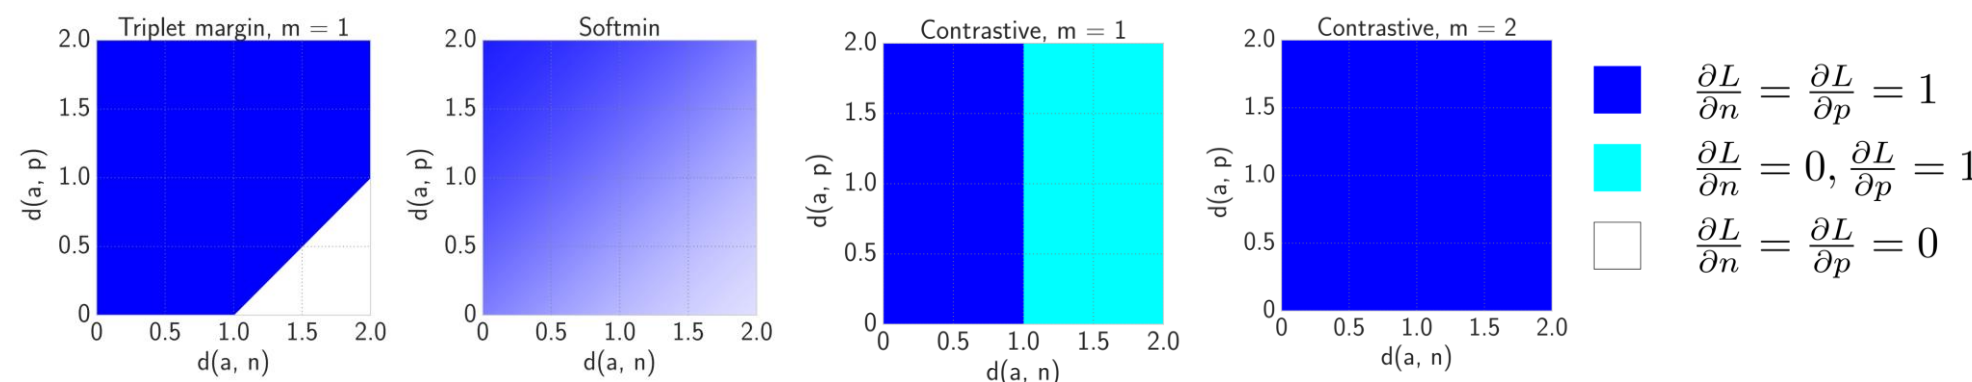

## Datasets

### Brown PhotoTour dataset:

3 sets, 400k DoG patches each:

- Liberty (shown)
- Notre-Dame
- Yosemite

Size: 64x64, grayscale, obtained from SfM model

### HPatches dataset:

reference image + 5 target images:

V: 57 images – photometric changes

I: 59 images – geometric changes

**WBS and HPatches experiments: descriptors were trained on the Brown Liberty**

**Retrieval: HardNet++ model was trained on all sets of Brown + HPatches**

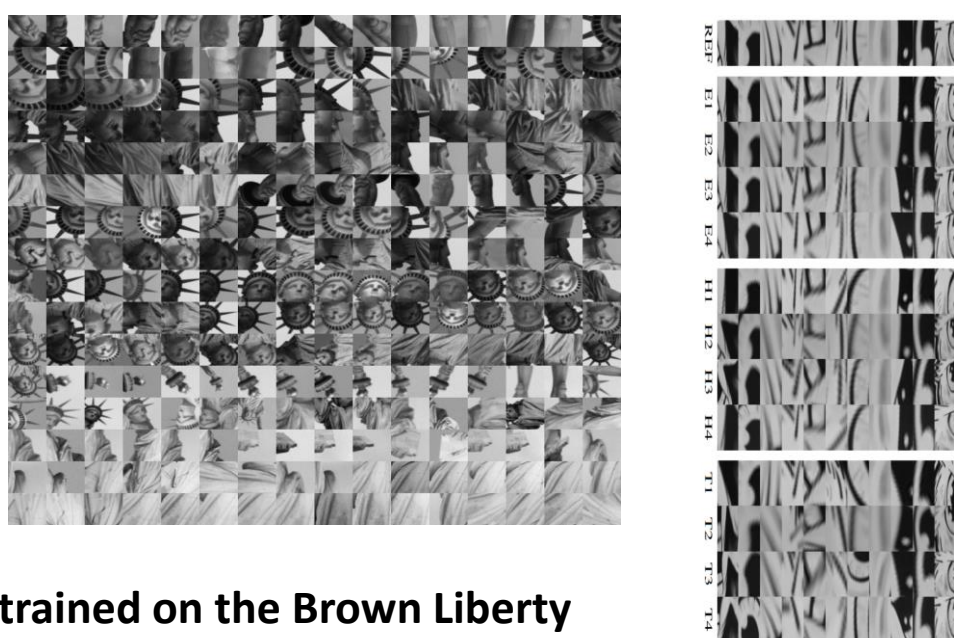

## HardNet

## (L2Net Architecture)

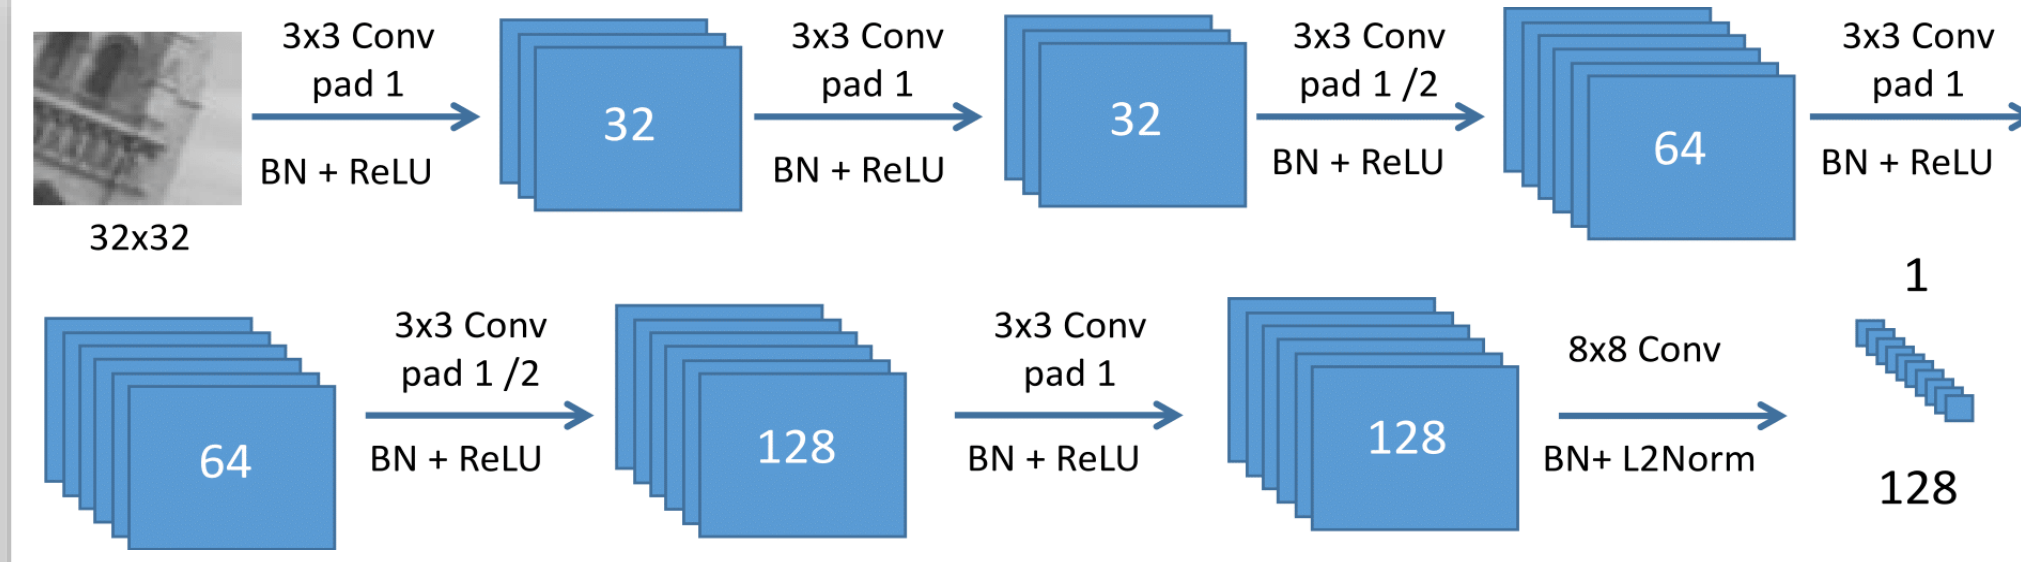

## Wide baseline stereo examples

### Correct inliers with HardNet

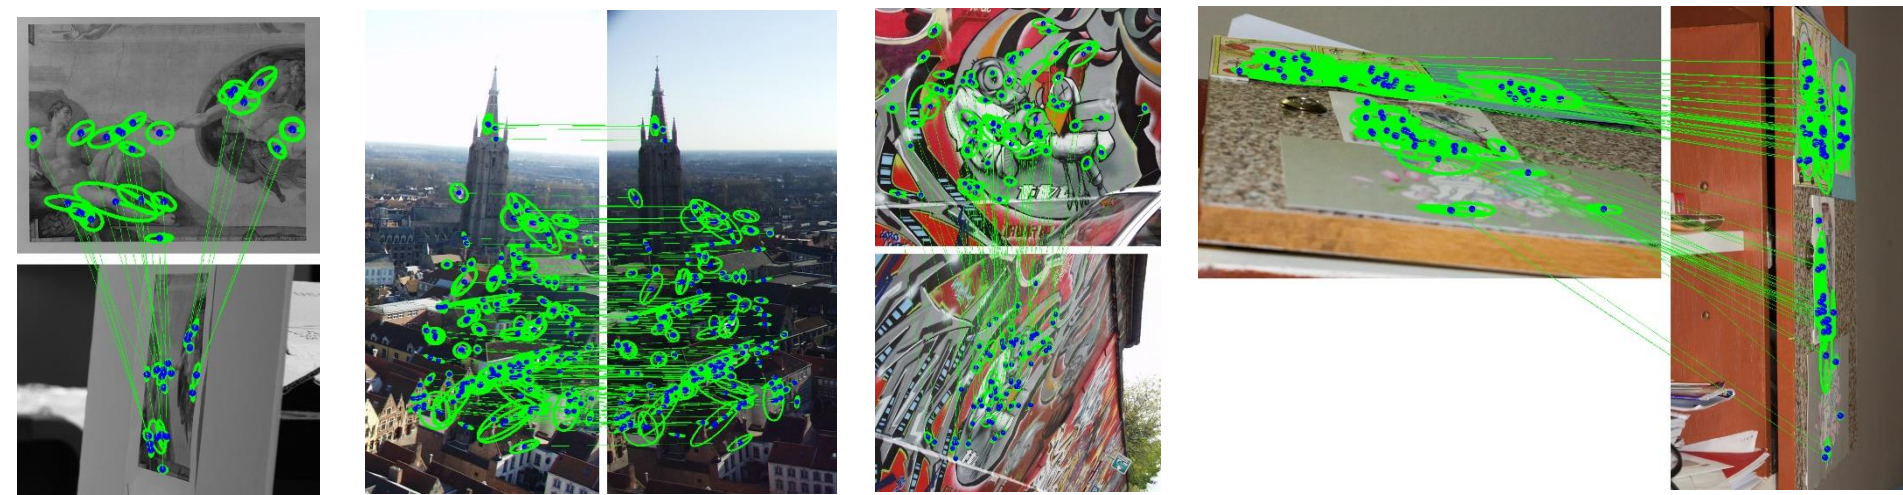

### Correct inliers with RootSIFT

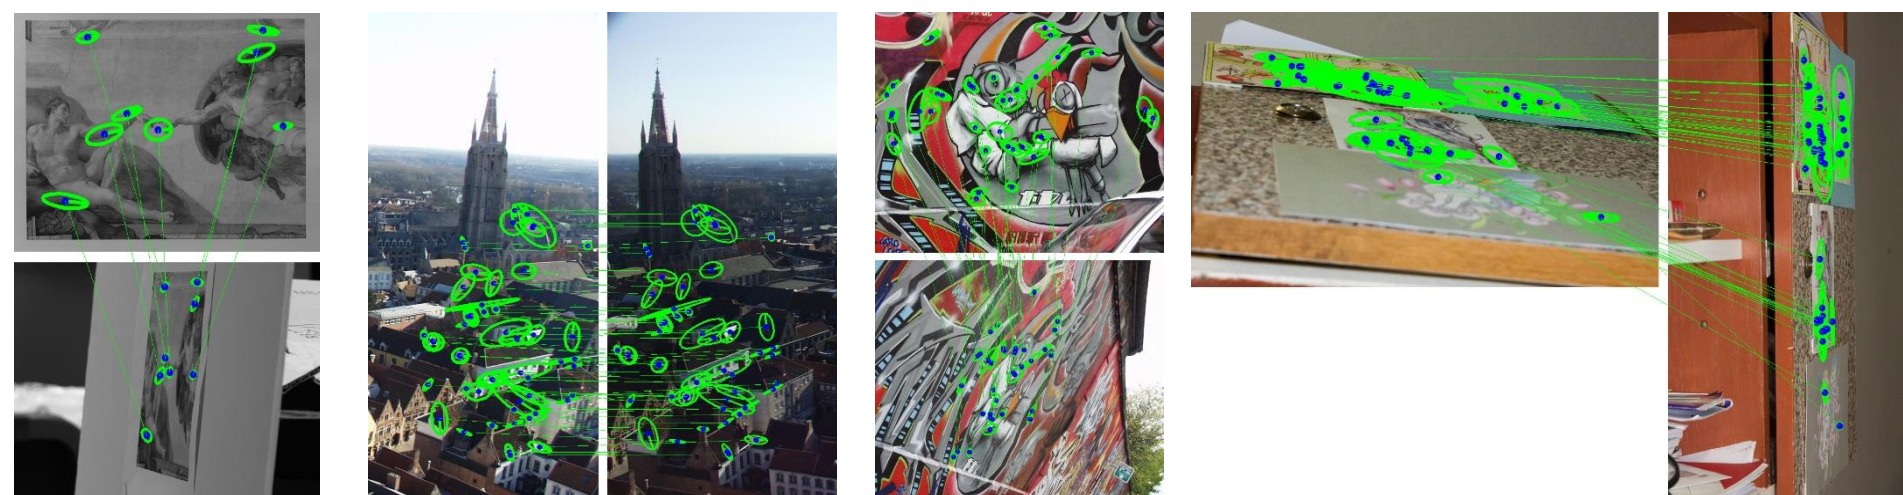

## Wide baseline stereo matching on W1BS

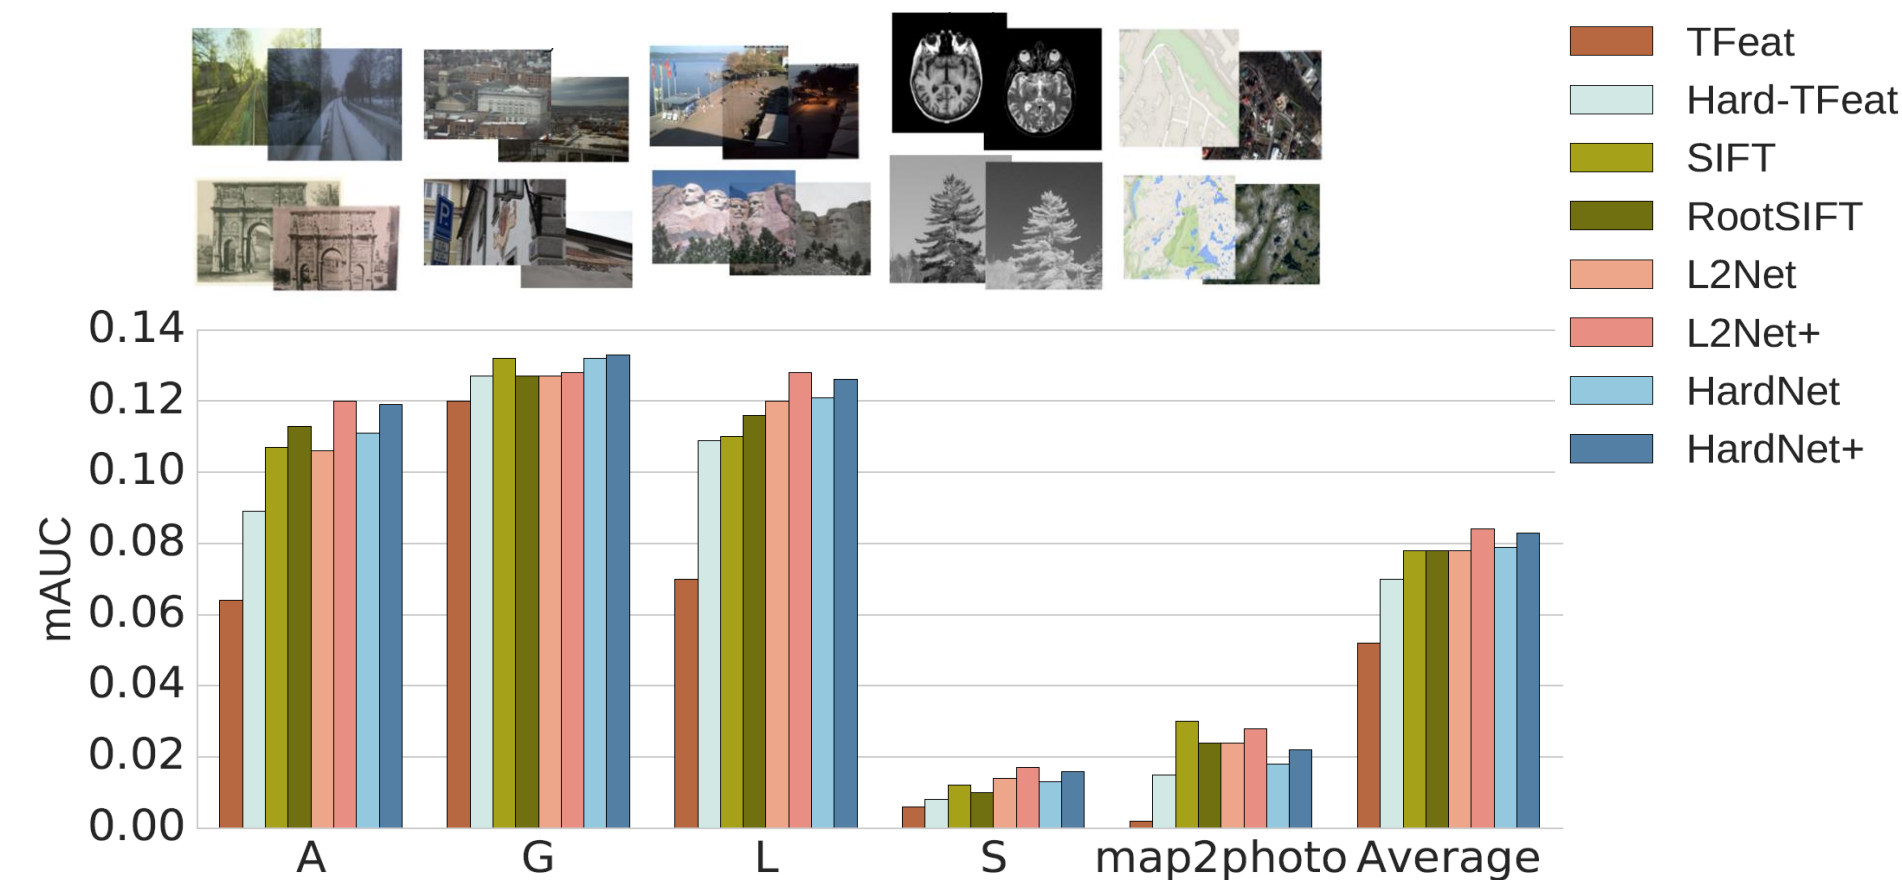

A – appearance, G – geometry, L – illumination, S – sensor

Note: training data is G+L type only

## HPatches Matching and Retrieval

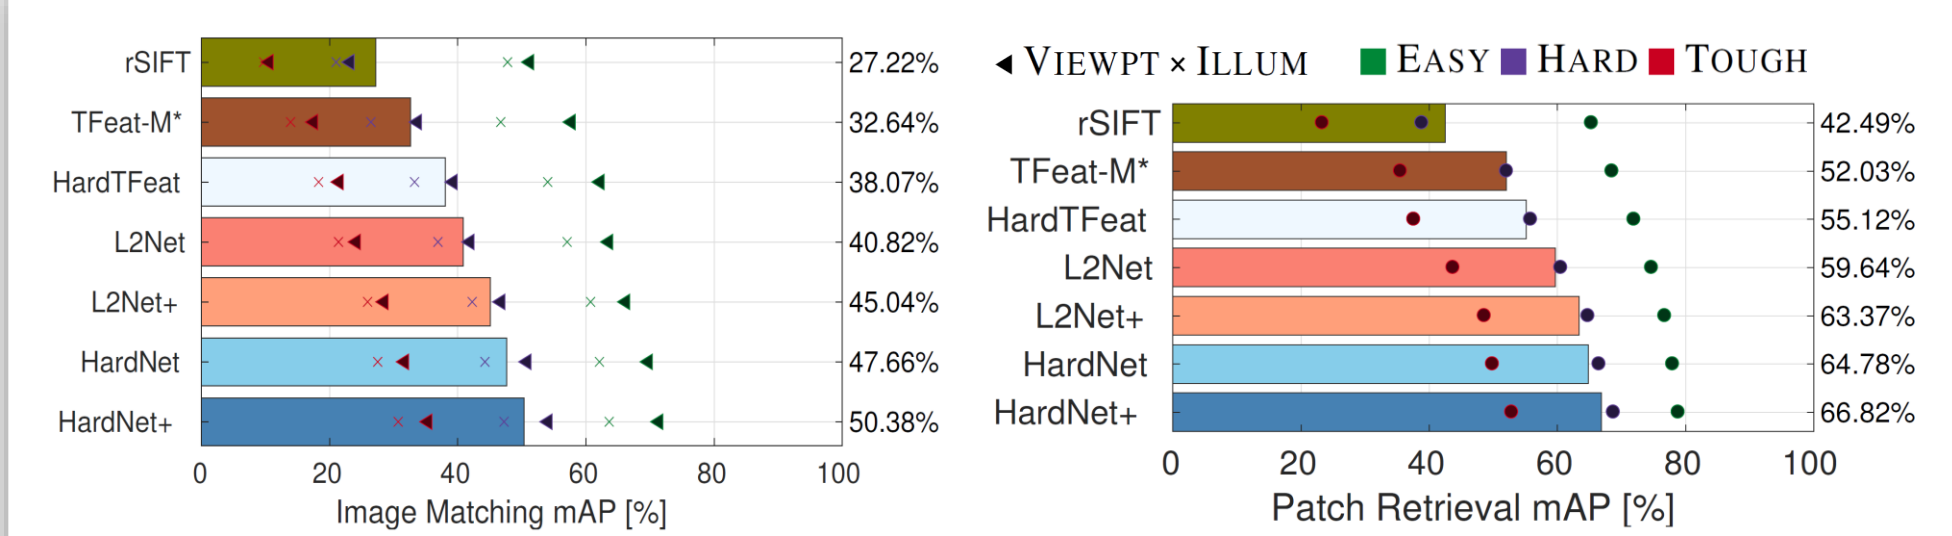

**None of the descriptors is trained on HPatches.** Marker color indicates the level of geometrical noise in: EASY, HARD and TOUGH. Marker type indicates the experimental setup. VIEWPT and ILLUM indicate the type of sequences for matching. + denotes training with data augmentation

## PhotoTour Patch Verification

False positive rate at true positive rate equal to 95% (FPR95), is reported. Lower is better

| Training                                | Notredame   | Yosemite    | Liberty     | Yosemite    | Liberty     | Notredame   | Mean        |
|-----------------------------------------|-------------|-------------|-------------|-------------|-------------|-------------|-------------|
| Test                                    | Liberty     | Notredame   | Yosemite    | Liberty     | Notredame   | FDR         | FPR         |
| SIFT [9]                                | 29.84       | 22.53       | 27.29       |             |             |             | 26.55       |
| MatchNet* [14]                          | 7.04        | 11.47       | 3.82        | 5.65        | 11.6        | 8.7         | 7.74        |
| TFeat-M* [23]                           | 7.39        | 10.31       | 3.06        | 3.8         | 8.06        | 7.24        | 6.47        |
| L2Net [24]                              | 3.64        | 5.29        | 1.15        | 1.62        | 4.43        | 3.30        | 3.24        |
| HardNet (ours)                          | <b>3.06</b> | <b>4.27</b> | <b>0.96</b> | <b>1.4</b>  | <b>3.04</b> | <b>2.53</b> | <b>3.00</b> |
| Augmentation: flip, 90° random rotation |             |             |             |             |             |             |             |
| GLoss+ [30]                             | 3.69        | 4.91        | 0.77        | 1.14        | 3.09        | 2.67        | 2.71        |
| DC2ch2st+ [15]                          | 4.85        | 7.2         | 1.9         | 2.11        | 5.00        | 4.10        | 4.19        |
| L2Net+ [24] +                           | 2.36        | 4.7         | 0.72        | 1.29        | 2.57        | <b>1.71</b> | 2.23        |
| HardNet+ (ours)                         | <b>2.28</b> | <b>3.25</b> | <b>0.57</b> | <b>0.96</b> | <b>2.13</b> | 2.22        | <b>1.97</b> |

## Image Retrieval on Oxford5k, Paris6k

All results are with spatial verification and query expansion. VS: vocabulary size. SA: single assignment. MA: multiple assignments. mAP is reported

| Method               | VS  | Oxford5k    |             | Paris6k     |             |
|----------------------|-----|-------------|-------------|-------------|-------------|
|                      |     | SA          | MA          | SA          | MA          |
| SIFT-BoW [36]        | 1M  | 78.4        | 82.2        | –           | –           |
| SIFT-BoW-fVocab [46] | 16M | 74.0        | 84.9        | 73.6        | 82.4        |
| RootSIFT-HQE [43]    | 65k | 85.3        | 88.0        | 81.3        | 82.8        |
| HardNet++-HQE        | 65k | <b>86.8</b> | <b>88.3</b> | <b>82.8</b> | <b>84.9</b> |

## References

- [SIFT] D. G. Lowe. Distinctive image features from scale-invariant keypoints. In IJCV 2004
- [TFeat] Balntas et.al. Learning local feature descriptors with triplets and shallow convolutional neural networks. In BMVC 2016
- [L2Net] B. Fan et.al. L2-Net: Deep learning of discriminative patch descriptor in euclidian space. In CVPR 2017

## Download

This poster

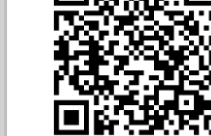

<http://cmp.felk.cvut.cz/~mishkdmy/posters/hardnet2017.pdf>

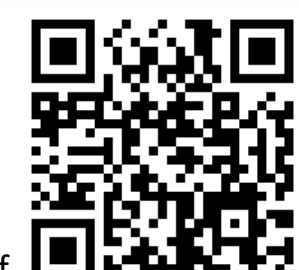

Training code in PyTorch, weights in PyTorch and Caffe

<https://github.com/DagnyT/hardnet>
